# Supplementary material for: The Activity Enhancement Effect of Ionic Liquids on Oxygen Reduction Reaction Catalysts: From Rotating Disk Electrode to Membrane Electrode Assembly
Source: MDPI journal article supplement (doi:10.3390/catal11080989), 2021-08-18
Supplement: s1 [file s1]

## **Supplementary Information**

### **The activity enhancement effect of ionic liquids on oxygen reduction reaction catalysts: from rotating disk electrode to membrane electrode assembly**

Kan Huang<sup>1</sup>, Oscar Morales-Collazo<sup>2</sup>, Zhichao Chen<sup>2</sup>, Tangqiumei Song<sup>2</sup>, Liang Wang<sup>1</sup>, Honghong Lin<sup>1</sup>, Joan F. Brennecke<sup>2\*</sup>, and Hongfei Jia<sup>1\*</sup>

1. Toyota Research Institute of North America, 1555 Woodridge Ave., Ann Arbor, MI 48105, USA
2. McKetta Department of Chemical Engineering, 200 E. Dean Keaton St. Stop C0400, University of Texas at Austin, Austin, TX 78712, USA

MTBD\_BETI.10.fid

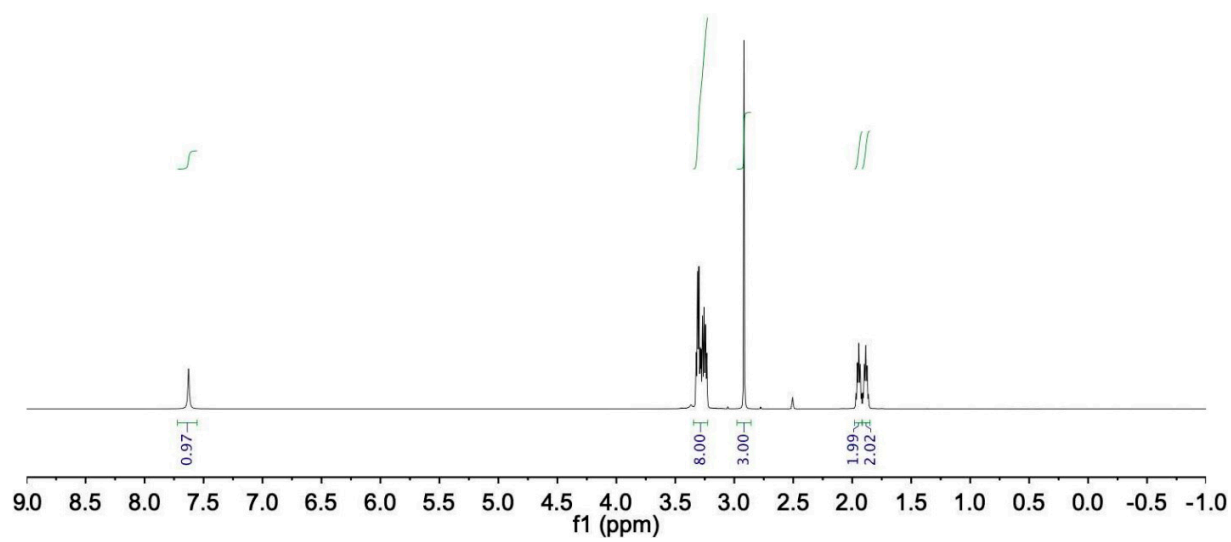

**Figure S1.**  $^1\text{H}$  NMR spectrum of [MTBD][beti].

MTBD\_BETI.11.fid

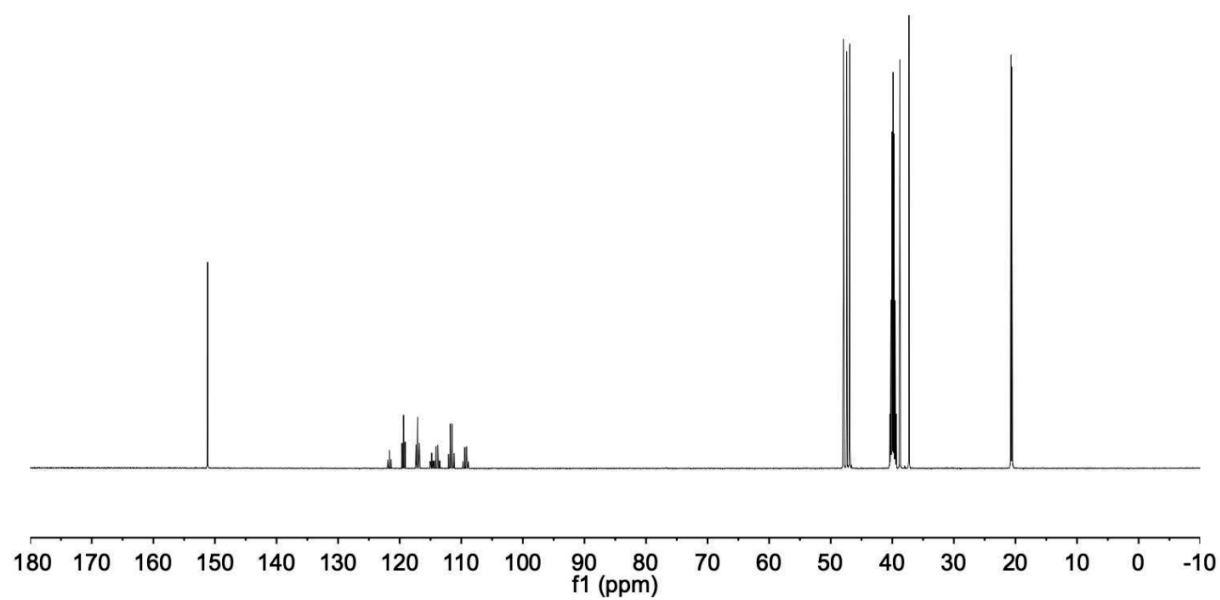

**Figure S2.**  $^{13}\text{C}$  NMR spectrum of [MTBD][beti].

MTBD\_BETI.12.fid

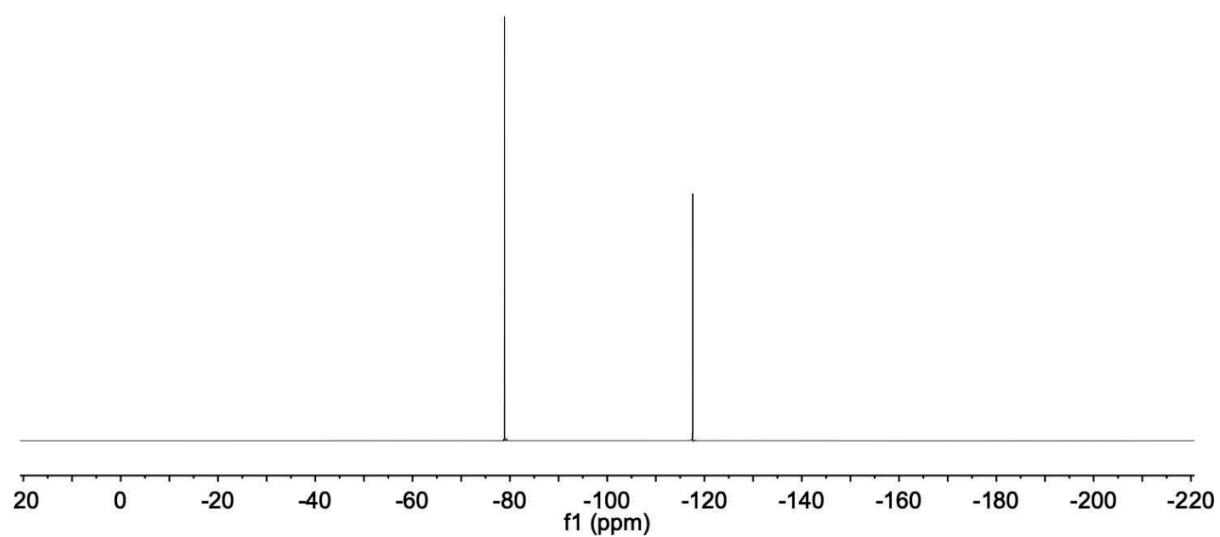

**Figure S3.**  $^{19}\text{F}$  NMR spectrum of [MTBD][beti].

MTBD\_Tf2N.10.fid

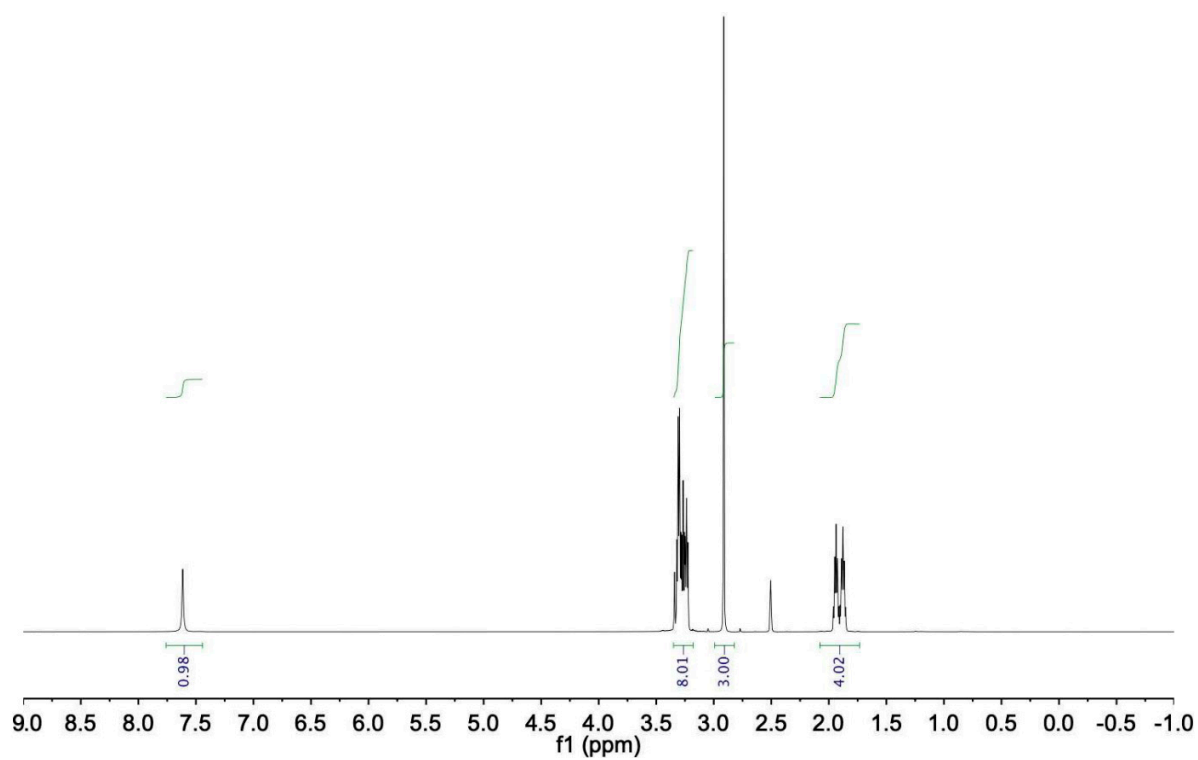

**Figure S4.**  $^1\text{H}$  NMR spectrum of [MTBD][TFSI].

MTBD\_Tf2N.11.fid

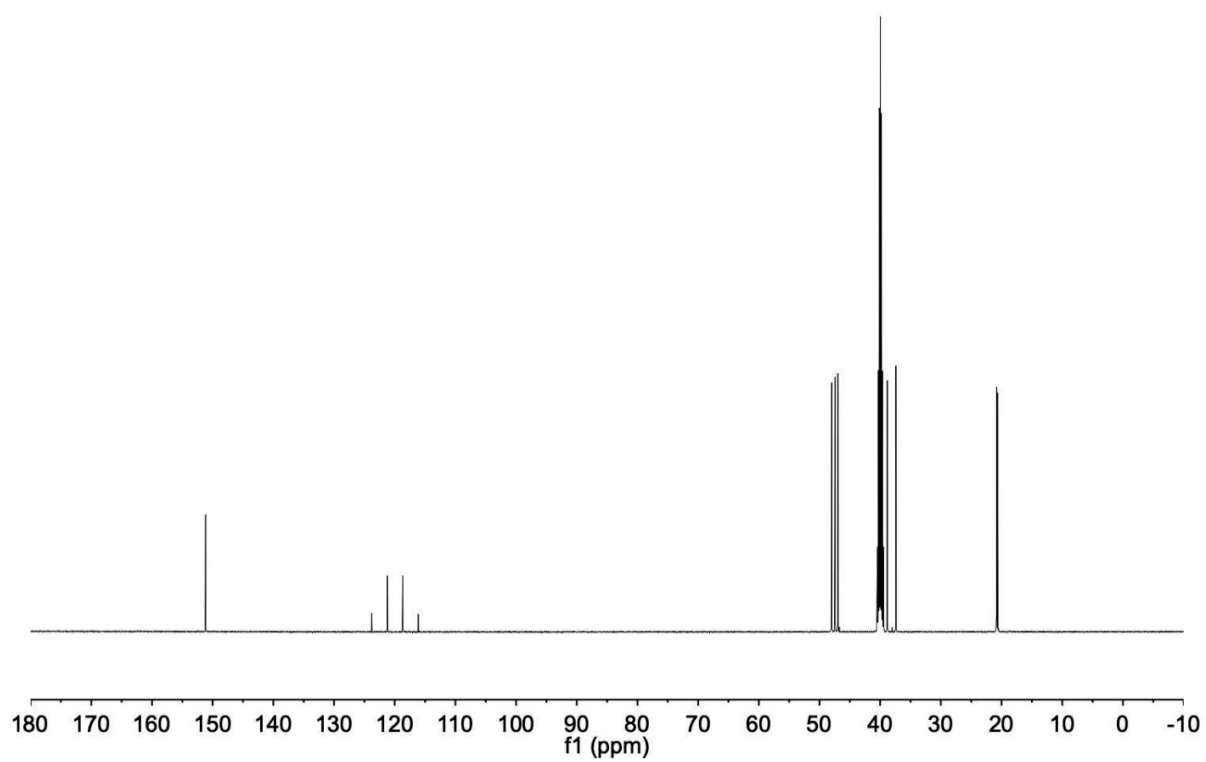

**Figure S5.**  $^{13}\text{C}$  NMR spectrum of [MTBD][TFSI].

MTBD\_Tf2N.12.fid

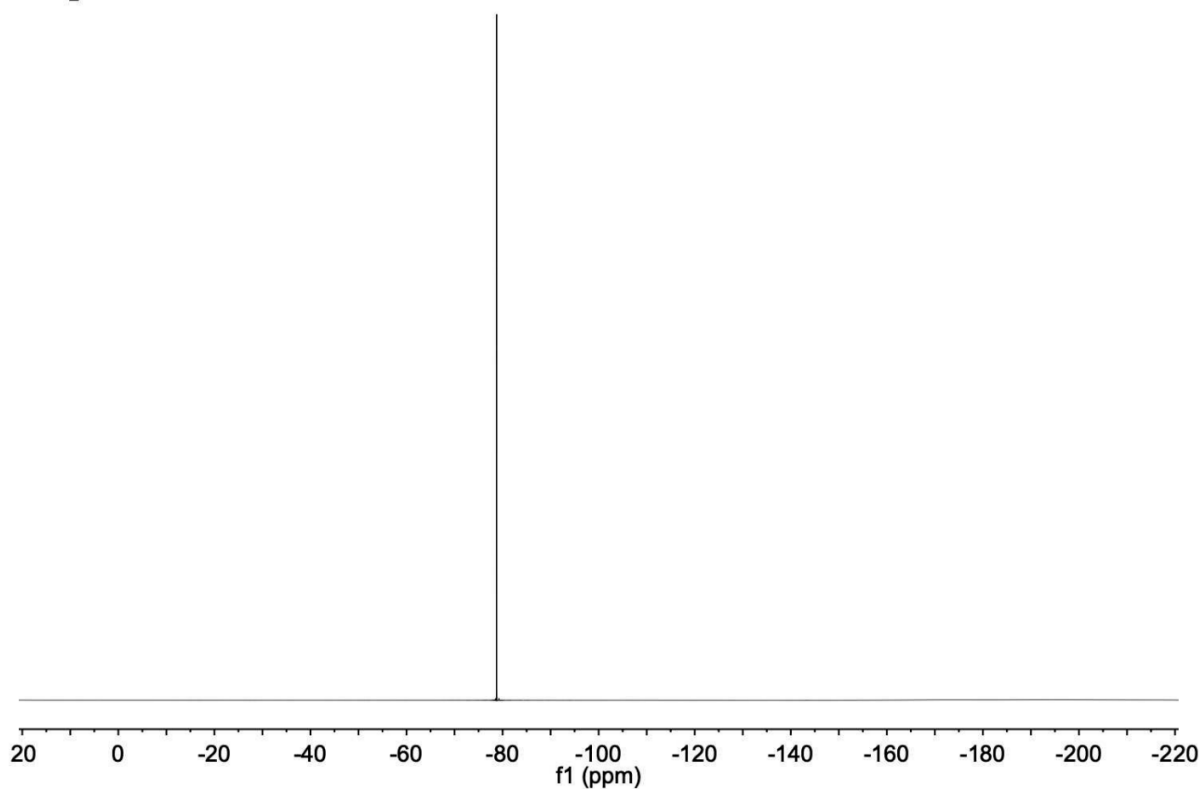

**Figure S6.**  $^{19}\text{F}$  NMR spectrum of [MTBD][TFSI].

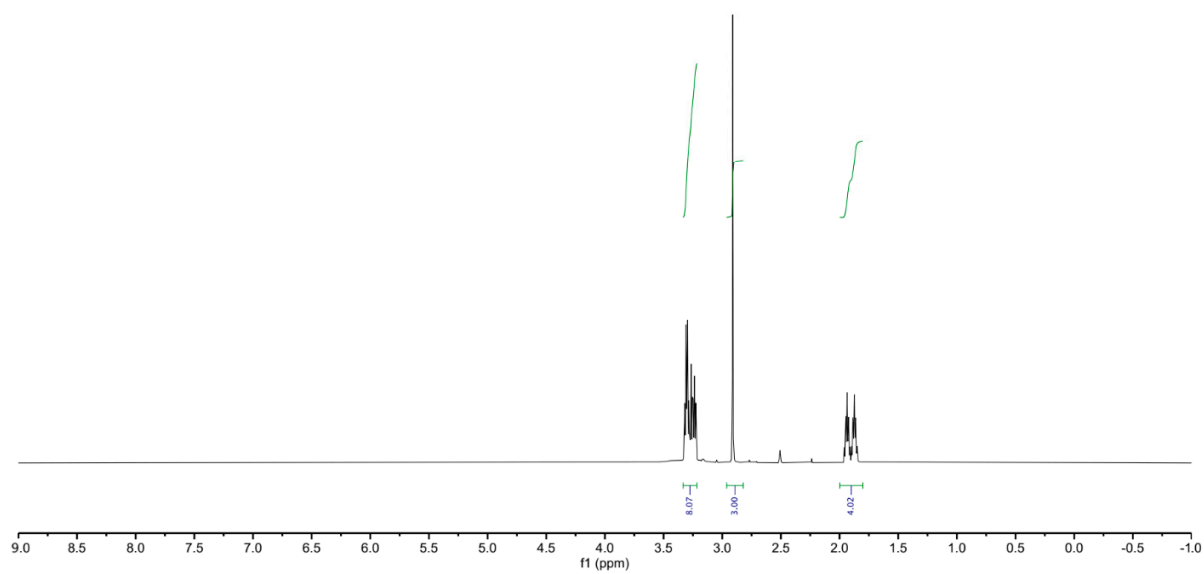

**Figure S7.**  $^1\text{H}$  NMR spectrum of  $[\text{MTBD}][\text{C}_4\text{F}_9\text{SO}_3]$ .



UT5\_95\_MTBD\_C4F9SO3.12.fid

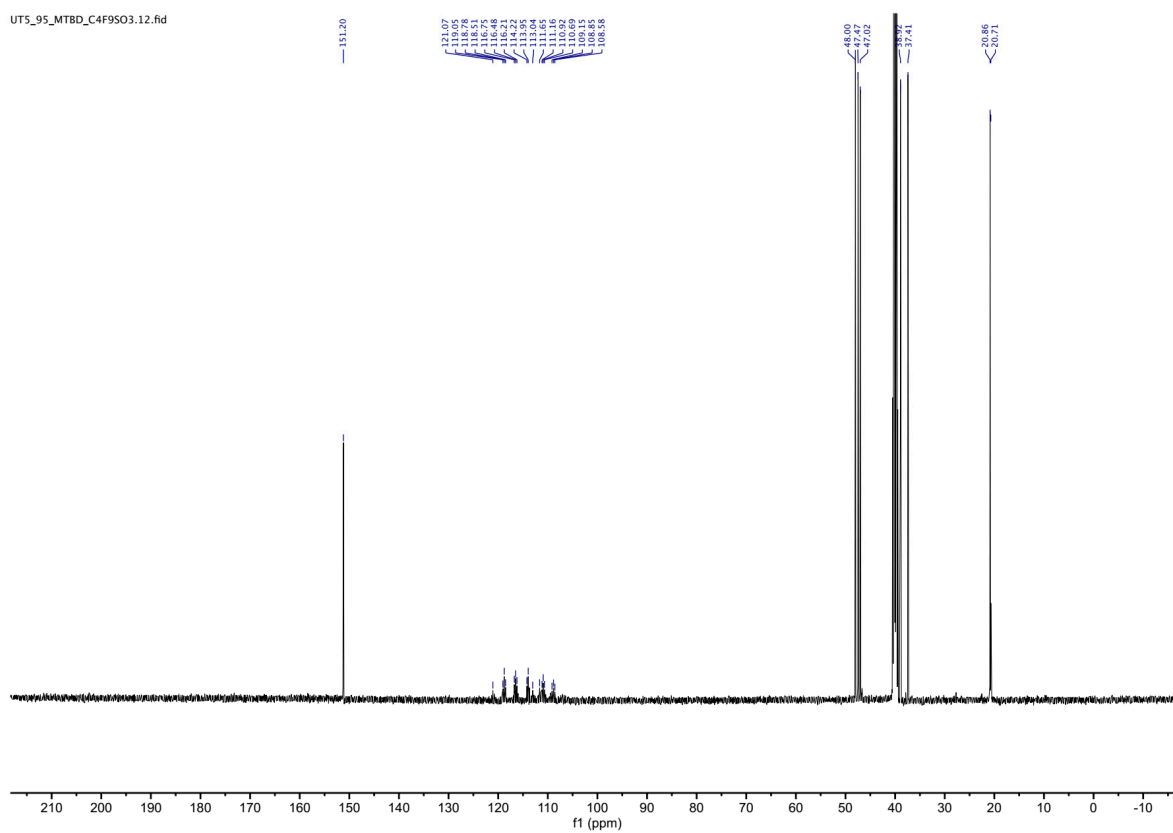

**Figure S8.**  $^{13}\text{C}$  NMR spectrum of  $[\text{MTBD}][\text{C}_4\text{F}_9\text{SO}_3]$ .

UT5\_95\_MTBDC4F9SO3.11.fid

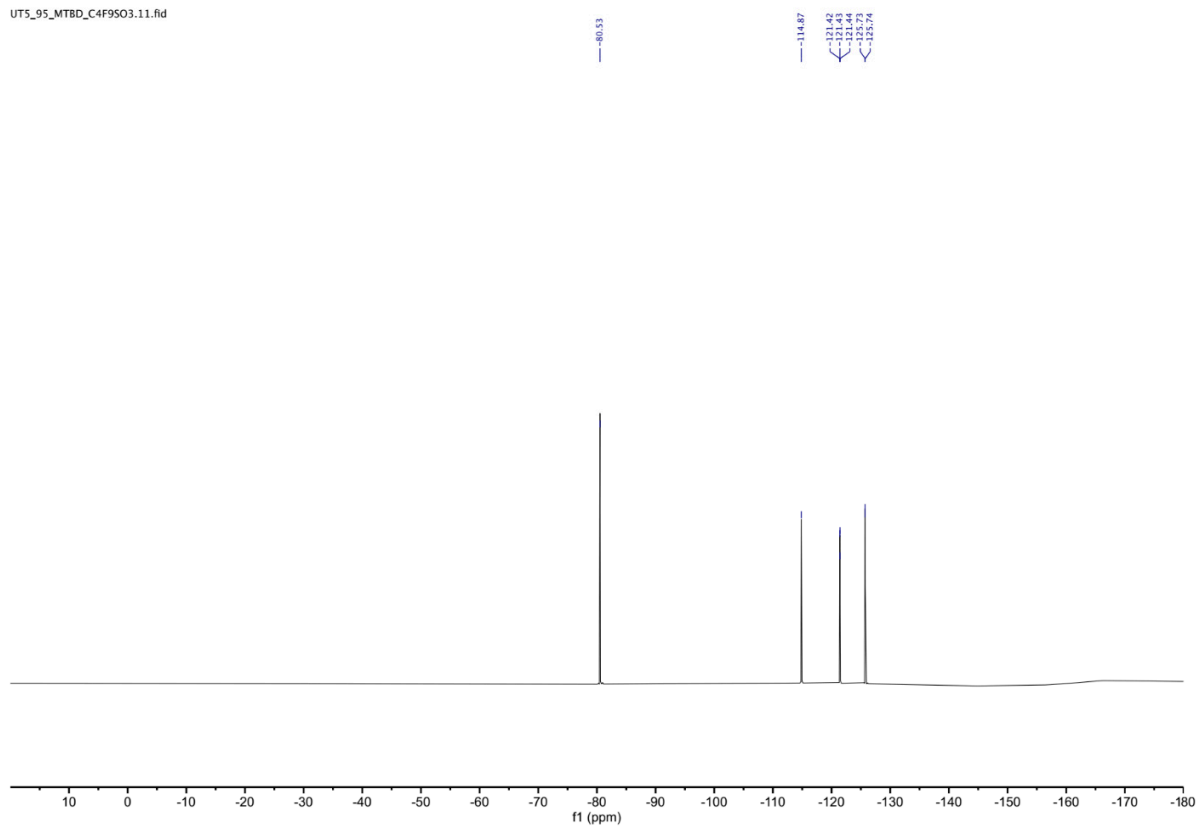

**Figure S9.**  $^{19}\text{F}$  NMR spectrum of  $[\text{MTBD}][\text{C}_4\text{F}_9\text{SO}_3]$ .

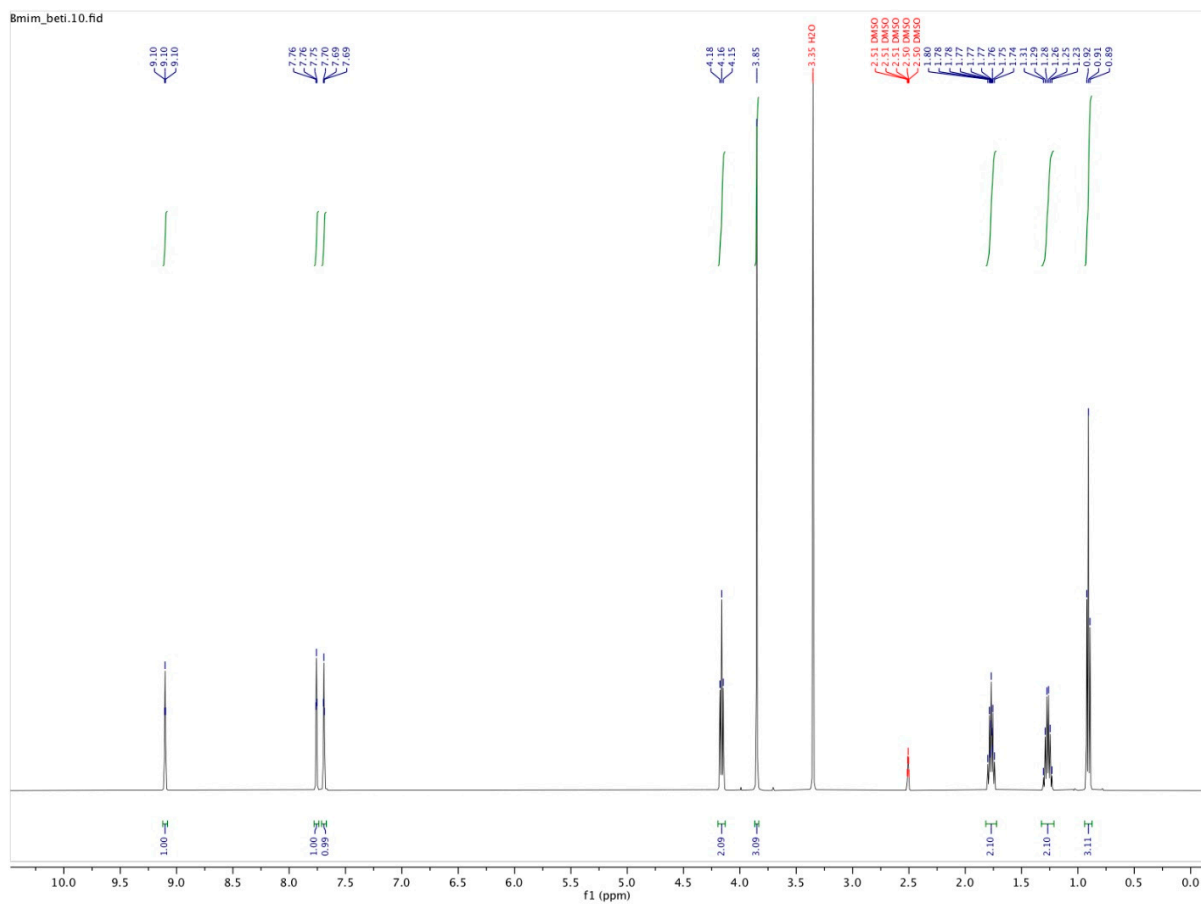

**Figure S10.**  $^1\text{H}$  NMR spectrum of [bmim][beti].

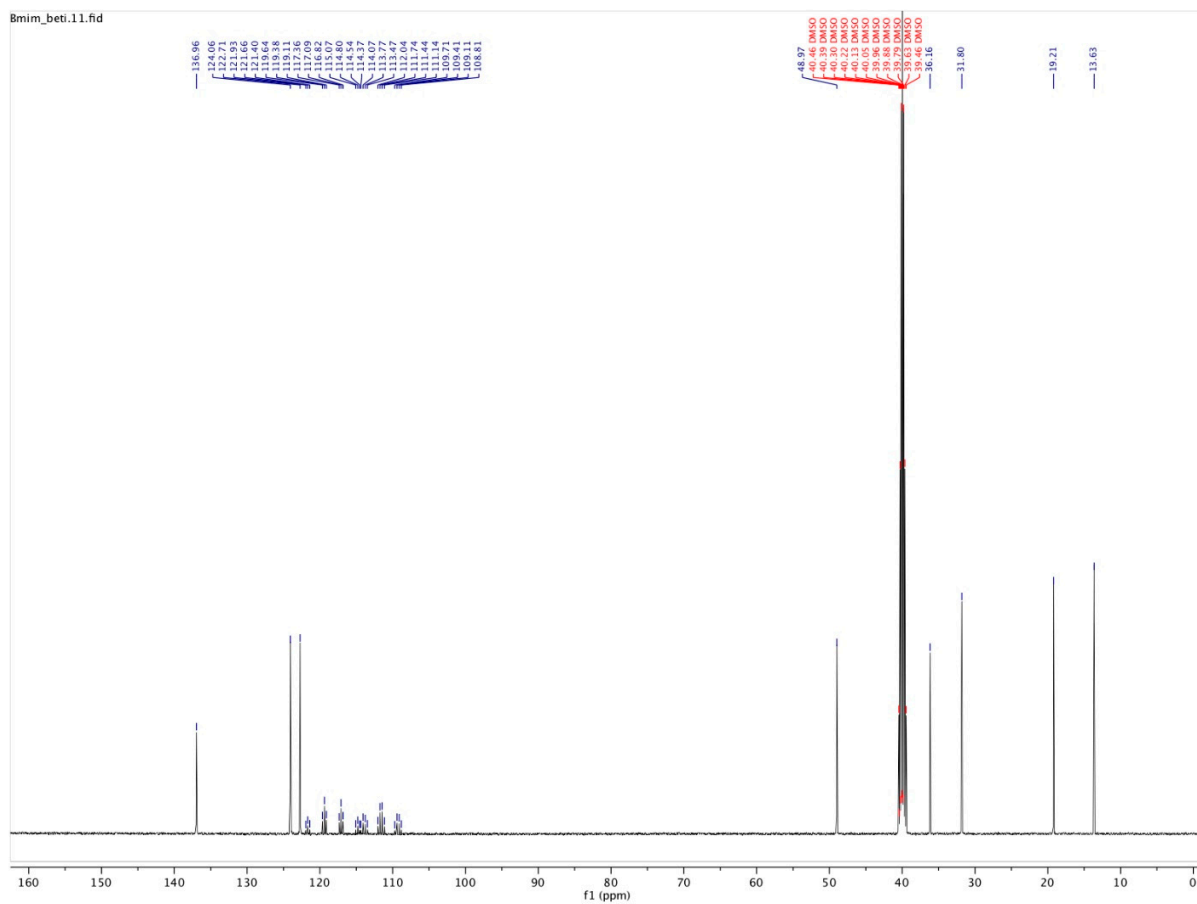

**Figure S11.**  $^{13}\text{C}$  NMR spectrum of [bmim][beti].

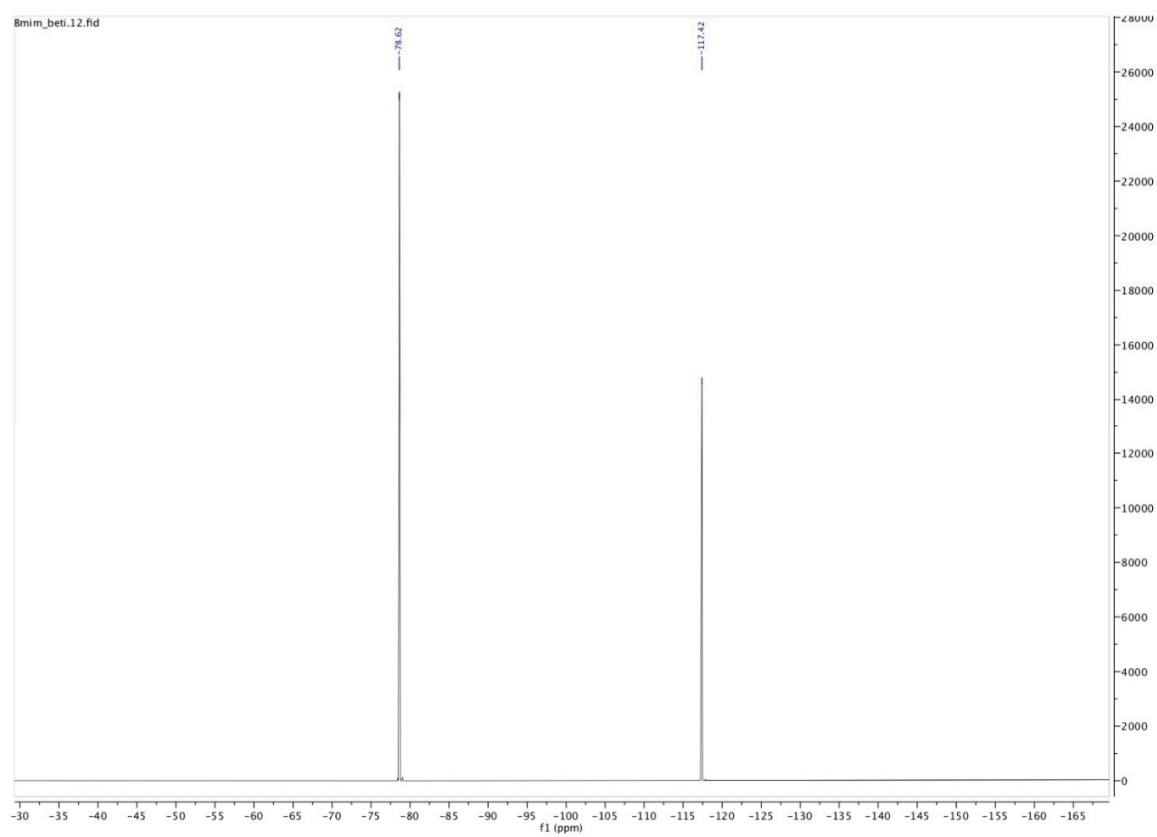

**Figure S12.**  $^{19}\text{F}$  NMR spectrum of [bmim][beti].

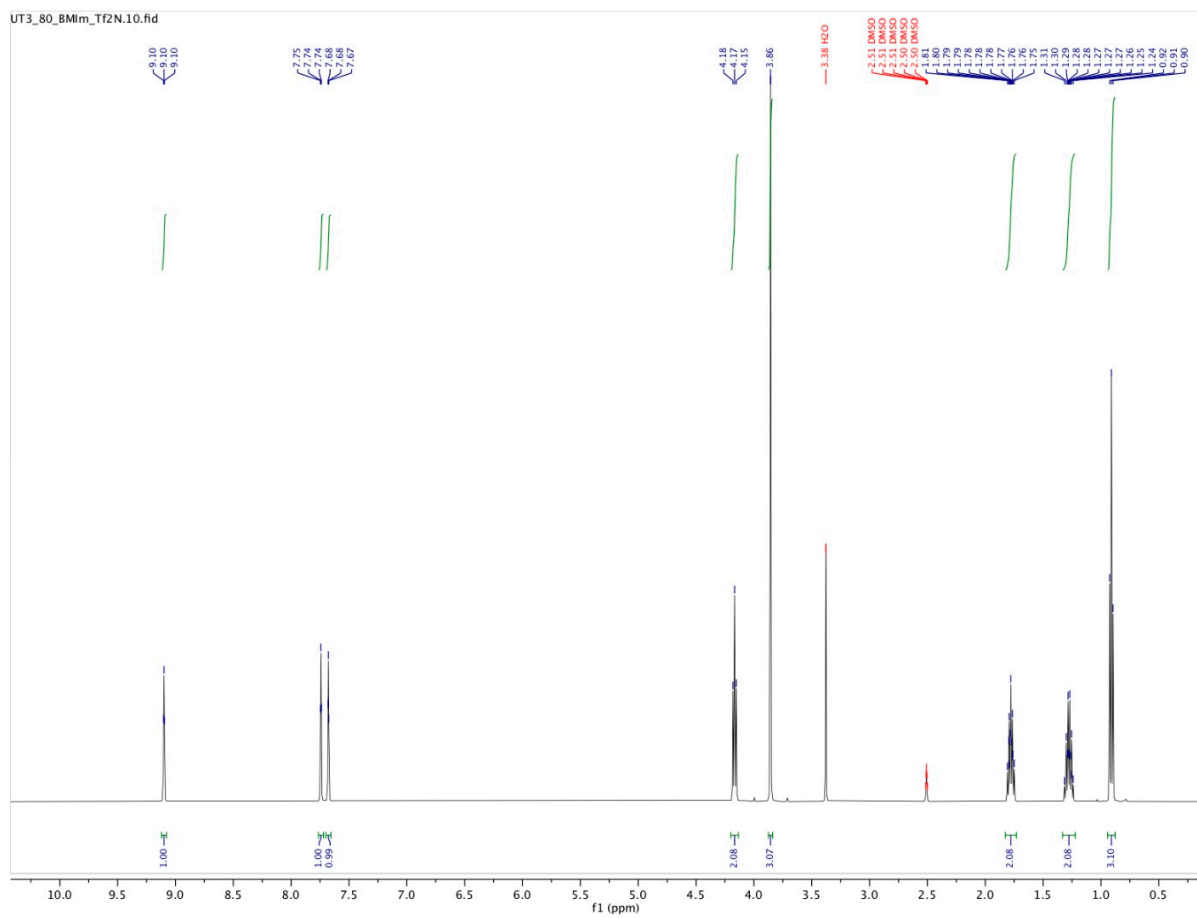

**Figure S13.**  $^1\text{H}$  NMR spectrum of [bmim][TFSI].

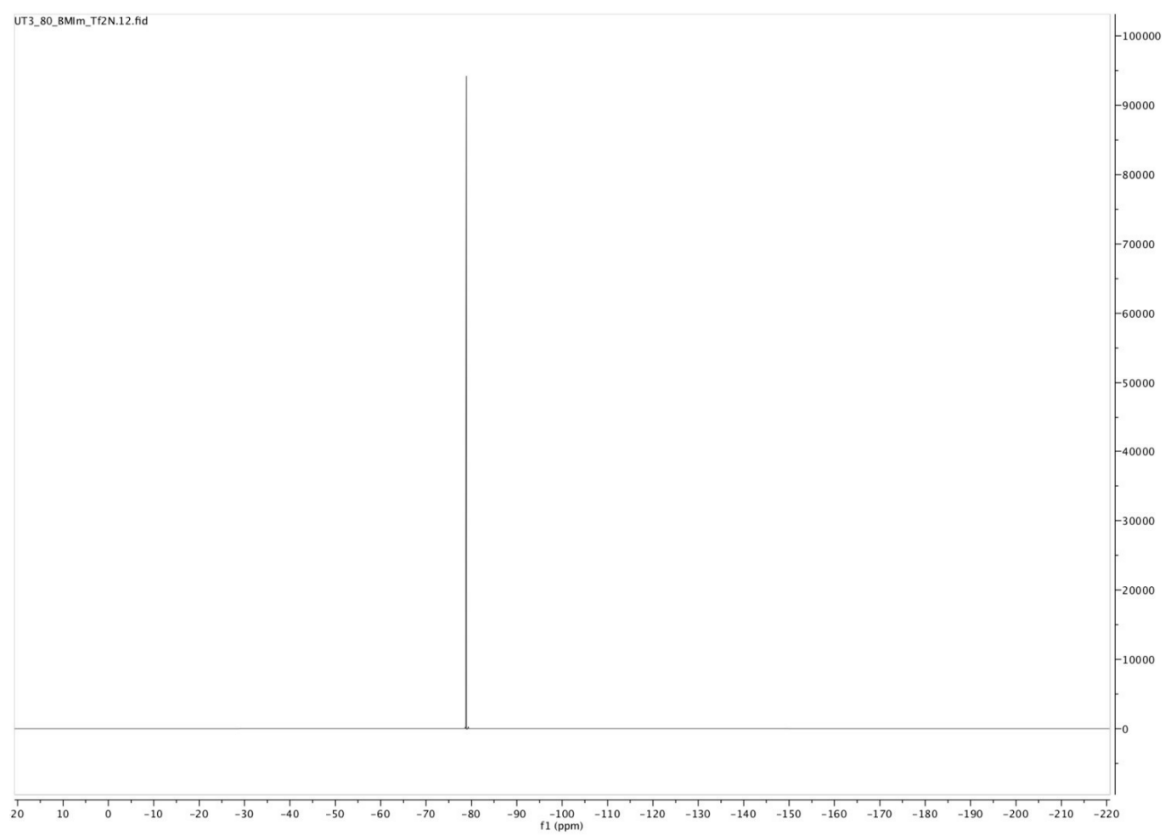

**Figure S14.**  $^{19}\text{F}$  NMR spectrum of [bmim][TFSI].

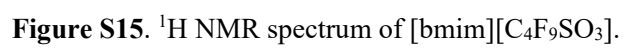

**Figure S15.**  $^1\text{H}$  NMR spectrum of [bmim][C<sub>4</sub>F<sub>9</sub>SO<sub>3</sub>].



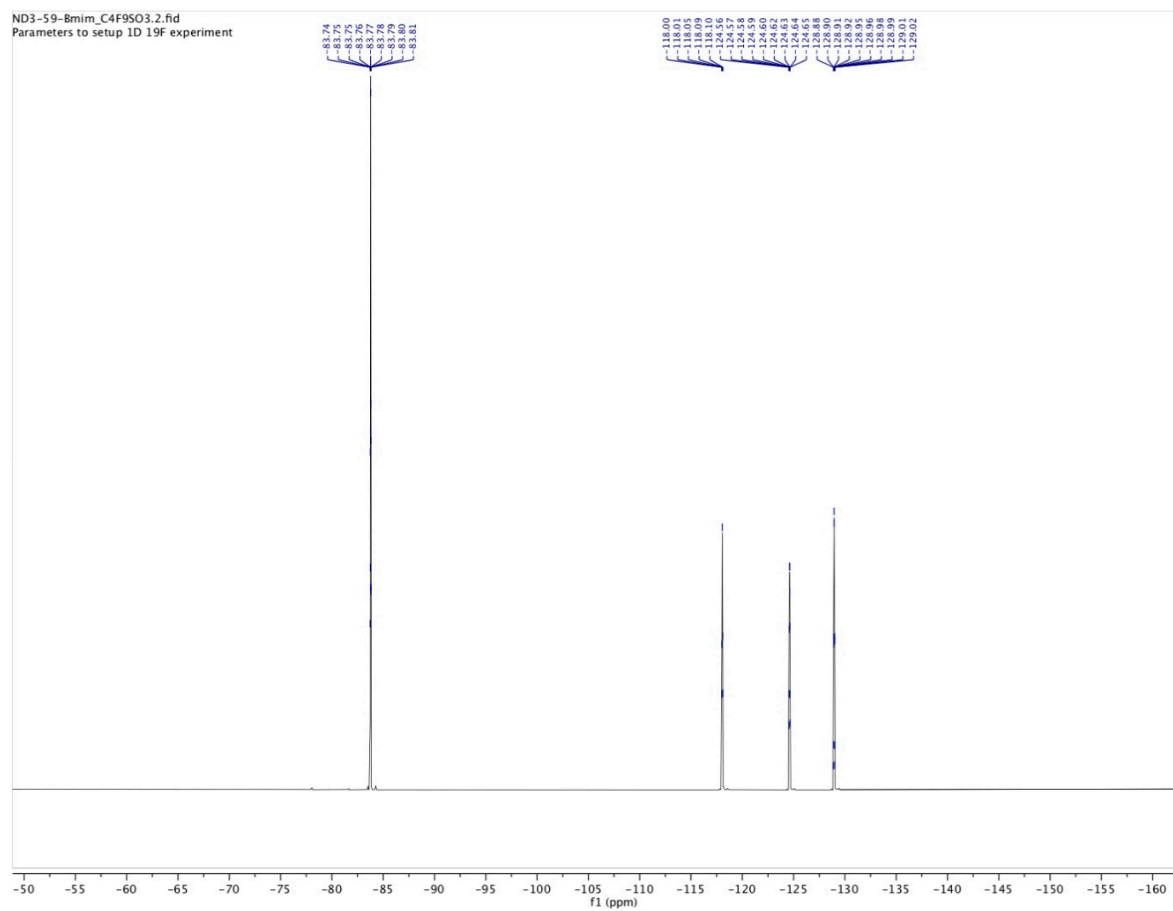

**Figure S16.**  $^{19}\text{F}$  NMR spectrum of  $[\text{bmim}][\text{C}_4\text{F}_9\text{SO}_3]$ .
